# Supplementary material for: Development of Multidrug Resistance in Acute Myeloid Leukemia Is Associated with Alterations of the LPHN1/GAL-9/TIM-3 Signaling Pathway
Source: MDPI journal article supplement (doi:10.3390/cancers13143629), 2021-07-20
Supplement: s1 [file s1]

**Table S1.** PCR primers with characterization of T<sub>A</sub> and respective PCR products used in the study.

| Target gene   | Primer's sequence                                                  | T <sub>A</sub> (°C) | PCR product (bp) |
|---------------|--------------------------------------------------------------------|---------------------|------------------|
| <i>ABCB1</i>  | F: 5'-AAGTTGTATATGGTGGGAACT-3'<br>R: 5'-AATTTTGTACCAATTCCTTCATT-3' | 57.0                | 429              |
| <i>ABCC1</i>  | F: 5'-AGAAGTCTGGACGTCCCTG-3'<br>R: 5'-ACACCAAGCCGGCGTCTTT-3'       | 59.1                | 404              |
| <i>ACTB</i>   | F: 5'-CTGGGACGACATGGAGAAAA-3'<br>R: 5'-AAGGAAGGCTGGAGAGTCC-3'      | 54.4                | 564              |
| <i>ADGRL1</i> | F: 5'-ACCTCGACACACGAGTCAAGA-3'<br>R: 5'-GATCCAGGGCATCACGTAGA-3'    | 56.9                | 90               |
| <i>CD44</i>   | F: 5'-CTGCCGCTTTGCAGGTGTA-3'<br>R: 5'-CATTGTGGGCAAGGTGCTATT-3'     | 56.0                | 109              |
| <i>HAVCR2</i> | F: 5'-GGAATACAGAGCGGAGGTCTG-3'<br>R: 5'-AGGGACACATCTCCTTTGCG-3'    | 56.2                | 213              |
| <i>LGALS9</i> | F: 5'-GAAATGACATTGCCTTCCAATTCA-3'<br>R: 5'-GAAGAGGATCCCGTTCACCA-3' | 56.2                | 194              |

**Table S2:** Comparison of N-glycosylation and O-glycosylation sites prediction of GAL-9 isoforms

| GAL-9 isoform    | N-glycosylation sites | O-glycosylation sites |
|------------------|-----------------------|-----------------------|
| FL; isoform long | 3                     | 8                     |
| Isoform X1       | 3                     | 11                    |
| Isoform short    | 3                     | 7                     |
| Isoform X2       | 3                     | 5                     |
| Isoform X3       | 3                     | 9                     |
| Isoform 3        | 3                     | 8                     |
| Isoform X4       | 3                     | 5                     |
| Isoform X5       | 3                     | 8                     |

Glycosylation sites were predicted by NetNGlyc 1.0 Server (<http://www.cbs.dtu.dk/services/NetNGlyc/>; Gupta R, Brunak S. Prediction of glycosylation across the human proteome and the correlation to protein function. *Pac Symp Biocomput.* 2002;;310-22. PMID: 11928486y) and NetOGlyc 4.0 Server (<http://www.cbs.dtu.dk/services/NetOGlyc/>; Steentoft C, Vakhrushev SY, Joshi HJ, Kong Y, Vester-Christensen MB, Schjoldager KT, Lavrsen K, Dabelsteen S, Pedersen NB, Marcos-Silva L, Gupta R, Bennett EP, Mandel U, Brunak S, Wandall HH, Lavery SB, Clausen H. Precision mapping of the human O-GalNAc glycoproteome through SimpleCell technology. *EMBO J*, 32(10):1478-88, May 15, 2013.(doi: 10.1038/emboj.2013.79. Epub 2013 Apr 12)

**Table S3:** Sequencing identification details for *LGALS9* TVs amplicons

|                       | PCR product (bp) | Number of bp from sequencing / identities by BLASTN |
|-----------------------|------------------|-----------------------------------------------------|
| TV1, Full length (FL) | 560              | 516 / 99%                                           |
| X1; Δ6                | 524 (230)*       | 185 / 98%                                           |
| TV2; Δ5               | 464              | 427 / 99%                                           |
| X2; Δ5,6              | 428              | 427 / 99%                                           |
| X3; Δ10               | 397 (278)*       | 242 / 100%                                          |
| TV4; Δ5,10            | 301              | 266 / 99%                                           |
| X4; Δ5,6,10           | 265              | 265 / 99%                                           |
| X5; Exon 6'; Δ6-11    | 288              | 243 / 99%                                           |

\* for sequencing analysis of these splice variants, special pair of primers (for each variant separately and specific only for X1 and X3) were used in additional experiments (data not shown) because of purification problems from agarose gel (X1 and X3 variants formed heteromers with other variants, namely TV4 and X2 and even extensive gel electrophoresis was not sufficient for separating them)

**Table S4:** Summary of gene and protein expression in resistant SKM-1/VCR cells compared to parental sensitive variant SKM-1

| SKM-1/VCR         |                 |                 |              |                            |                 |
|-------------------|-----------------|-----------------|--------------|----------------------------|-----------------|
| LGALS9/GAL-9      |                 |                 | HAVCR2/TIM-3 |                            |                 |
| TV/isoform        | mRNA            | Protein         | Isoform      | mRNA*                      | Protein         |
| TV1/isoform long  | ↓ (significant) | ↑ (significant) | 35 kDa       | ↑ (marginally significant) | ↑ (significant) |
| X1/X1             | = (ns)          | ↓ (ns)          | 55 kDa       |                            | ↑ (ns)          |
| TV2/isoform short | ↑ (significant) | =               | CD44/CD44    |                            |                 |
| X2/X2             | ↑ (ns)          | ↓ (ns)          |              |                            |                 |
| X3/X3             | ↑ (ns)          | undetermined    | Isoform      | mRNA*                      | Protein         |
| TV4/isoform 3     | =               | undetermined    | 38 kDa       | ↑ (marginally significant) | ↑ (ns)          |
| X4/X4             | ↑ (ns)          | ↓ (ns)          | 46 kDa       |                            | =               |
| X5/X5             | ↑ (significant) | =               | 85-95 kDa    |                            | ↑ (significant) |

\* in case of *HAVCR2* and *CD44* expression at mRNA, total level of all transcripts was determined. ↑ -upregulation; ↓ - downregulation; ns – non-significant

**Table S5:** Summary of gene and protein expression in resistant MOLM-13/VCR cells compared to parental sensitive variant MOLM-13

| MOLM-13/VCR       |                    |                 |              |                 |                 |
|-------------------|--------------------|-----------------|--------------|-----------------|-----------------|
| LGALS9/GAL-9      |                    |                 | HAVCR2/TIM-3 |                 |                 |
| TV/isoform        | mRNA               | Protein         | Isoform      | mRNA*           | Protein         |
| TV1/isoform long  | ↓<br>(significant) | ↑ (ns)          | 35 kDa       | ↑ (significant) | ↑ (ns)          |
| X1/X1             | ↓<br>(significant) | ↓ (significant) | 55 kDa       |                 | ↑ (ns)          |
| TV2/isoform short | =                  | ↓ (significant) | CD44/CD44    |                 |                 |
| X2/X2             | =                  | ↓ (significant) |              |                 |                 |
| X3/X3             | ↓ (ns)             | undetermined    | Isoform      | mRNA*           | Protein         |
| TV4/isoform 3     | =                  | undetermined    | 38 kDa       | =               | ↓ (significant) |
| X4/X4             | ↓ (ns)             | ↓ (ns)          | 46 kDa       |                 | ↑ (ns)          |
| X5/X5             | =                  | =               | 85-95 kDa    |                 | ↑ (ns)          |

\* in case of *HAVCR2* and *CD44* expression at mRNA, total level of all transcripts was determined. ↑ -upregulation; ↓ - downregulation; ns – non-significant

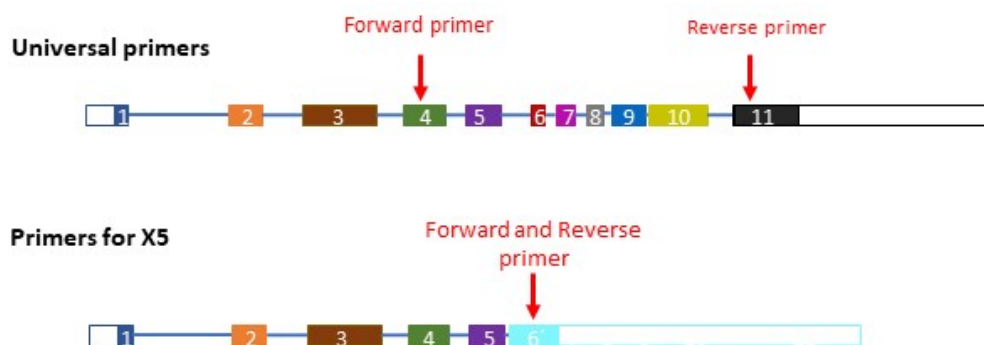

**Figure S1:** Design of primers for RT-PCR detection of *LGALS9* splice variants. Universal pair of primers were designed to exon 4 (forward) and 11 (reverse), exons included in 7 variants (except X5 variant). RT-PCR produced mixture of amplicons with different molecular mass. For detection of X5 variant, both primers were designed to specific exon 6' which does not occur in other variants.

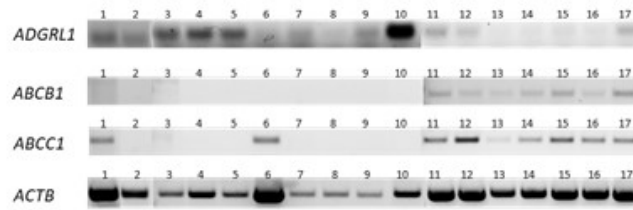

**Figure S2:** Representative agarose gel of *ADGRL1*, *ABCB1* and *ABCC1* detection in MDS clinical samples, where *ACTB* was used as internal control. Densitometric analysis was performed using ImageJ software.

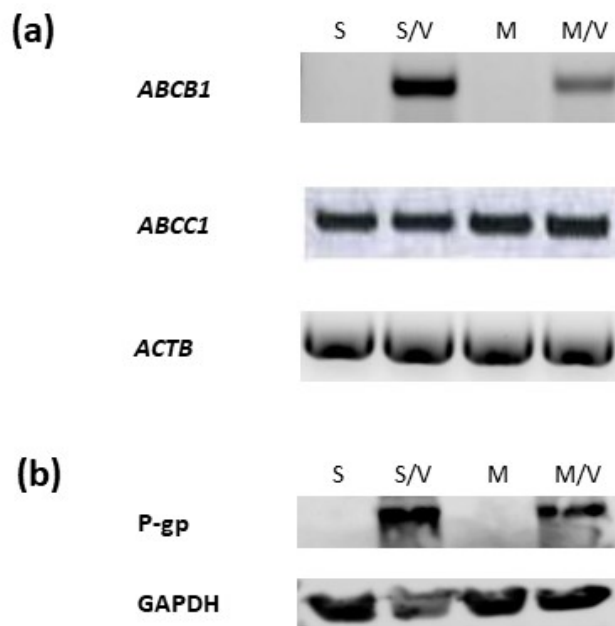

**Figure S3:** Expression of *ABCB1* and *ABCC1* in SKM-1 and MOLM-13 and their resistant counterparts. (a) representative agarose gel of PCR products for both genes, when *ACTB* was used as internal loading control. No changes were detected for *ABCC1* gene in drug-sensitive and respective drug-resistant variants. Upregulation of *ABCB1* as a result of selection/adaptation to VCR was detected only in SKM-1/VCR and MOLM-13/VCR, what is consistent with qRT-PCR and our previous papers. (b) representative Western blot of P-gp (product of *ABCB1* gene), whose expression was detected only in drug-resistant cell lines. S – SKM-1; S/V – SKM-1/VCR; M – MOLM-13; M/V – MOLM-13/VCR.

```

INTRON_5-6_FL_LGALS9      gtgagttcaacacagaggccctgggtggccgagcagacagtaggaaggaccgagggtctg 60
ref|XM_011524796.2|:627-2101 ----- 0
INTRON_5-6_FL_LGALS9      agaggctggcccccagccagcaggccactcagggcctacaggccgcctcttgcacccaa 120
ref|XM_011524796.2|:627-2101 ----- 0
INTRON_5-6_FL_LGALS9      gagttccctgtctctgtccgctgggacccagagctggggacctgggggtaccctggat 180
ref|XM_011524796.2|:627-2101 ----- 0
INTRON_5-6_FL_LGALS9      tcttcactccctctctttacgtctctccaaggcacgaacgtgtctccctctgaagcca 240
ref|XM_011524796.2|:627-2101 -----GCACGAACGTGTCTCCCTCTGAAGCCA 28
INTRON_5-6_FL_LGALS9      ccgatgtggctcaggccctctgggattcctaccatgacgacagggtccagttcccccacc 300
ref|XM_011524796.2|:627-2101 -----CCGATGTGGTCCAGGCCCTCTGGGATTCTTCACATGACGACAGGGGTCCAGTTCGCCACC 88
INTRON_5-6_FL_LGALS9      ccctacacccaacactgccacagtgacctttctataagcaaatgtgatcacaccctctc 360
ref|XM_011524796.2|:627-2101 -----CCCTACACCCAACCACTGCCACAGTGACCTTCTTATAAGCAAAATGTGATCACACCTCTC 148
INTRON_5-6_FL_LGALS9      cctgcttaaaaaatcttcacagccccagcccttcaaaataagcccaaatcttcagcagg 420
ref|XM_011524796.2|:627-2101 -----CCTGTCTAAAAATCTTCACAGCCCCAGCCCTTCAAATAAAGCCCAAAATCTCCAGCAGG 208
INTRON_5-6_FL_LGALS9      gtatatgaattcctcccagctgtcccaatccacgtccctcctcaccctcccaacccacg 480
ref|XM_011524796.2|:627-2101 -----GTATATGAATTCCTCCCACTGTGCCCAATCCACGTCCCTCACCCTCCCAACCCACG 268
INTRON_5-6_FL_LGALS9      aagctcacgcagcctctgcagctcactcaaggccctctggggcaccatgcttttgata 540
ref|XM_011524796.2|:627-2101 -----AAGCTCACGCAGCCTCTGCAGCTCACTCAAGGCCCTCTTGGGCAACCATGCTTTGCATA 328
INTRON_5-6_FL_LGALS9      tgcgttccctgggtcccggaagcaccctctgcccagcctgcctcagcacatgcctaattgc 600
ref|XM_011524796.2|:627-2101 -----TGCTGTCCCTGGTCCCGGAAGCACCTCTGCCAGCCTGCCCTGAGCACATGCCATAATTGC 388
INTRON_5-6_FL_LGALS9      ccttccatgctctgcctaagtgcgctcctctggggagctctcccgctgggaatattgtt 660
ref|XM_011524796.2|:627-2101 -----CCTTCCATGCTCTGCTAAGTGCCGCTCTCTGGGAGCTCTCCCGCTGGAATATTGTT 448
INTRON_5-6_FL_LGALS9      ggacgctccctgggtgtccccacagagctgtgtgtatctgtgccatgccagttcacagc 720
ref|XM_011524796.2|:627-2101 -----GGACGCTCCCTGGTGTCCCCACAGAGTCTGTATGTATCTGTGCCATGCCAGTTCACAGC 508
INTRON_5-6_FL_LGALS9      acccattgtaactgtatttgctgtctgtccccgttactccaccccatgtccctatgc 780
ref|XM_011524796.2|:627-2101 -----ACCCATTGTAACGTATTTGCTGTCTGTCCCCGTACTCCACCCCAATGCTCCATATGC 568
INTRON_5-6_FL_LGALS9      ccattgagggcccccagaggccaggagctgtggctgtttcatttgacgtgctggcactca 840
ref|XM_011524796.2|:627-2101 -----CCATGAGGCCCCAGAGGGCCAGGAGCTGTGGCTGTTCATTGCACTGTGCTGGCACTCA 628
INTRON_5-6_FL_LGALS9      gtagggactcagtgaaatgaatggaatggtgttcacacagccaggagaaatgggatacc 900
ref|XM_011524796.2|:627-2101 -----GTAGGGACTCAGTGAATGAATGTGGAAATGGTTTACACAGCCAGGGAGAAATGGGATACC 688
INTRON_5-6_FL_LGALS9      agccagggcaagaacagctctactgggtggggcaggatccaggacaaggaggtgagcagcc 960
ref|XM_011524796.2|:627-2101 -----AGCCAGGGCAAGAACAGTCTACTGGTGGGGCAGGATCCAGGACAAGGAGGTGAGCAGCC 748
INTRON_5-6_FL_LGALS9      cttcctcggccactcaagtagtggggactggggaggaggggcgctttgtctacgagctc 1020
ref|XM_011524796.2|:627-2101 -----CTTCTCCGGCCACTCAAGTAGTGGGAGCTGGGAGGAGGGGCGCTTTGTCTACGAGTCT 808
INTRON_5-6_FL_LGALS9      tcttatggctcatcacgtacagacaggccacctgcctcctgcacgctgacttcaggac 1080
ref|XM_011524796.2|:627-2101 -----TCTTATGGCTCATCACGTACAGACAGGGCACCTGCCCTCTGCCACGCTGACTTCAGGAC 868
INTRON_5-6_FL_LGALS9      tggctgagccccagggaacatttgaggggagcccaacttggccctggccctggcgctg 1140
ref|XM_011524796.2|:627-2101 -----TGCTGAGCCCCAGGGAAACATTTGACAGGGCAGCCCAACTTTGGCCCTGGCCCTGGCGCTG 928
INTRON_5-6_FL_LGALS9      gccctggctctggggaggatagaagtgtgctggatcagtcagacagaactggctgcca 1200
ref|XM_011524796.2|:627-2101 -----GCCCTGGCTCTGGGGAGGATAGAAAAGTGTGCTGGATACAGTCAGACAGAAGTGGCTGCCA 988
INTRON_5-6_FL_LGALS9      ctttgatttgatcccttccaccttggcgaagcttgggcaagttgcttaattttctgagc 1260
ref|XM_011524796.2|:627-2101 -----CTTTGATTGATCCCTTCCACCTTGGCAAGTTGGGCAAGTTGCTTAATCTTTCTGAGC 1048
INTRON_5-6_FL_LGALS9      ctcgttgctcactaggacacaggagctgaggctgcttcccttgttggaaagcactgaa 1320
ref|XM_011524796.2|:627-2101 -----CTCGTTGCTCACTAGGACACAGGAGCTGAGGCTGCTTCCCTTGTGGAAAGCACTGAA 1108
INTRON_5-6_FL_LGALS9      gcccaggaaatgaccacaaataggccttcaacaaataccacttctacccttatgggtgaa 1380
ref|XM_011524796.2|:627-2101 -----GCCCAGGAATCGACCCCAATAGGCCTTCAACAAATACCACTTCTACCTTATGGGTGAA 1168
INTRON_5-6_FL_LGALS9      atatggcactggaagtaatgctcttctgctgggagctacagaaagcaatgaggtctcta 1440
ref|XM_011524796.2|:627-2101 -----ATATGGCACTGGAAGTAATGCTCTTCGCTGTGGGAGCTACAGAAAGCAATGAGGTCTCTA 1228
INTRON_5-6_FL_LGALS9      tcaaacccagctctcctctctctcgagaggaaacagtgagggtaccctaccctcccaacccc 1500
ref|XM_011524796.2|:627-2101 -----TCAAAACCCAGTCTCCTCTCTCTCGAGAGGAACAGTGGGATACCTTACCCCCAACCCC 1288
INTRON_5-6_FL_LGALS9      aaagccctgtacacctgggggtaaaaatcgggtgcccagggtcagggaaggcttgcttg 1560
ref|XM_011524796.2|:627-2101 -----AAAGCCCTGTACACCTGGGGGTAAAAATCTGGGTGCCACGGGCTCAGGAAGGCTTGCTTG 1348
INTRON_5-6_FL_LGALS9      ggagcaaggaggagggtgggtgtgtccggggaggcatttctgagcacaaagagcctccctgg 1620
ref|XM_011524796.2|:627-2101 -----GGAGCAAGAGGGAGGTGGGTGTGTCCGGGGAGGCATTCTGAGCACAAAGAGCCTCCCTGG 1408
INTRON_5-6_FL_LGALS9      agttttgcccacatctctccattctgtggtgcccgcgataaccacattctgactctc 1680
ref|XM_011524796.2|:627-2101 -----AGTTTGGCCACCATCTCCTCCATTCTGTGGTGCCGCGATAACCACCATCTGACTCTC 1468
INTRON_5-6_FL_LGALS9      ctcacccctccag 1693
ref|XM_011524796.2|:627-2101 -----CTCACCC----- 1475
*****

```

**Figure S4:** Full alignment (provided by Clustal Omega) of Intron 5-6 from FL *LGALS9* (from database Ensembl) and exon 6' from X5 variant (from NCBI- GENE database). Intron 5 – 6 of FL is 1693 NTs long, while exon 6' 1475 NTs. Exon 6' is almost completely identical with intron 5 – 6, exceptions are only first 212 NTs and last 6 NTS, that are probably spliced out in X5. Highlighted TAA STOP codon which leads to the truncation of X5.
